# Supplementary material for: Physical Interventions Restore Physical Frailty and the Expression of CXCL-10 and IL-1β Inflammatory Biomarkers in Old Individuals and Mice
Source: MDPI journal article supplement (doi:10.3390/biom14020166), 2024-01-31
Supplement: s1 [file s1]

|                         | Pre              |                | Post             |                |
|-------------------------|------------------|----------------|------------------|----------------|
|                         | Women<br>(n = 8) | Men<br>(n = 4) | Women<br>(n = 8) | Men<br>(n = 4) |
| <b>Age (years)</b>      | 78.63 ± 1.39     | 78 ± 1.87      |                  |                |
| <b>Body weight (kg)</b> | 69.19 ± 2.22     | 74.23 ± 4.24   | 69.01 ± 3.07     | 73.78 ± 4.67   |
| <b>TUG</b>              | 10.53 ± 0.48     | 9.15 ± 0.57    | 10.07 ± 0.48     | 9.2 ± 0.77     |
| <b>SPPB score</b>       | 6.75 ± 0.67      | 7.75 ± 1.03    | 7.5 ± 0.65       | 9.25 ± 0.85    |
| Robust (10-12)          | 0 (0%)           | 1 (25%)        | 1 (12.5%)        | 2 (50%)        |
| Prefrail (7-9)          | 5 (62.5%)        | 1 (25%)        | 5 (62.5%)        | 2 (50%)        |
| Frail (4-6)             | 3 (37.5%)        | 2 (25%)        | 2 (25%)          | 0 (0%)         |

**Supplementary File S1.** Description of Primary Care setting cohort according to gender before and after 12-week exercise training intervention.

| Marker       | Pre            | Post          | p-value              |
|--------------|----------------|---------------|----------------------|
| ENA-78       | 1717 ± 229.9   | 1815 ± 263.1  | 0.5186 <sup>a</sup>  |
| G-CSF        | 590.1 ± 68.86  | 479.7 ± 64.85 | 0.0989 <sup>b</sup>  |
| GM-CSF       | 520.4 ± 109    | 415.3 ± 92.51 | 0.0366 <sup>b</sup>  |
| GRO          | 2291 ± 446.5   | 2801 ± 549.3  | 0.1302 <sup>b</sup>  |
| GRO-alpha    | 1530 ± 248.9   | 1160 ± 201.7  | 0.021 <sup>a</sup>   |
| I-309        | 786.5 ± 209.2  | 1002 ± 222    | 0.0015 <sup>a</sup>  |
| IL-1alpha    | 939.3 ± 249.8  | 910.3 ± 194.8 | 0.9697 <sup>a</sup>  |
| IL-1beta     | 1540 ± 317.8   | 1370 ± 280    | 0.064 <sup>a</sup>   |
| IL-2         | 581.5 ± 115.4  | 603.2 ± 121.9 | 0.8501 <sup>a</sup>  |
| IL-3         | 1856 ± 380.1   | 1846 ± 357.8  | >0.9999 <sup>a</sup> |
| IL-4         | 635.8 ± 123    | 732.3 ± 129.3 | 0.0425 <sup>a</sup>  |
| IL-5         | 1319 ± 274.4   | 1381 ± 260.4  | 0.5693 <sup>a</sup>  |
| IL-6         | 640.7 ± 93.83  | 509.2 ± 105.4 | 0.064 <sup>a</sup>   |
| IL-7         | 534.3 ± 122    | 351.6 ± 60.96 | 0.0342 <sup>a</sup>  |
| IL-8         | 2124 ± 487.1   | 2199 ± 521    | 0.3804 <sup>a</sup>  |
| IL-10        | 817 ± 183.5    | 586.1 ± 119.8 | 0.0122 <sup>a</sup>  |
| IL12-p40     | 1304 ± 224.6   | 1330 ± 233.5  | >0.999 <sup>a</sup>  |
| IL-13        | 406.8 ± 51.17  | 468.4 ± 55.15 | 0.2334 <sup>a</sup>  |
| IL-15        | 939.8 ± 191.8  | 992.4 ± 170.4 | 0.4697 <sup>a</sup>  |
| IFN-gamma    | 1362 ± 117     | 1361 ± 132.8  | 0.985 <sup>b</sup>   |
| MCP-1        | 6061 ± 1062    | 6199 ± 1008   | 0.6377 <sup>a</sup>  |
| MCP-2        | 1465 ± 371.8   | 1379 ± 322    | 0.3804 <sup>a</sup>  |
| MCP-3        | 793.3 ± 157.1  | 721.6 ± 151.8 | 0.6772 <sup>a</sup>  |
| M-CSF        | 1922 ± 417.2   | 1840 ± 406.5  | 0.9097 <sup>a</sup>  |
| MDC          | 1874 ± 278     | 1751 ± 242.6  | 0.6564 <sup>b</sup>  |
| MIG          | 5056 ± 666.4   | 4589 ± 542.2  | 0.463 <sup>b</sup>   |
| MIP-1 beta   | 2296 ± 531.8   | 2163 ± 448.7  | 0.4238 <sup>a</sup>  |
| MIP-1-delta  | 5157 ± 624.3   | 5428 ± 695.8  | 0.3385 <sup>b</sup>  |
| RANTES       | 11,088 ± 1781  | 12,916 ± 1696 | 0.0133 <sup>b</sup>  |
| SCF          | 1239 ± 281.2   | 1159 ± 237.6  | 0.2661 <sup>a</sup>  |
| SDF-1        | 2469 ± 844.5   | 2266 ± 758.2  | 0.4238 <sup>a</sup>  |
| TARC         | 1217 ± 191.5   | 1095 ± 128.8  | 0.2112 <sup>b</sup>  |
| TGF-beta 1   | 689.3 ± 221.9  | 581.3 ± 159.8 | 0.2334 <sup>a</sup>  |
| TNF-alpha    | 1037 ± 191.7   | 954.8 ± 184.1 | 0.3804 <sup>a</sup>  |
| TNF-beta     | 1058 ± 253.9   | 1012 ± 243    | 0.8501 <sup>a</sup>  |
| EGF          | 2619 ± 336.4   | 2931 ± 397.9  | 0.0782 <sup>a</sup>  |
| IGF-1        | 3308 ± 334.8   | 2830 ± 306.1  | 0.2231 <sup>b</sup>  |
| Angiogenin   | 17,941 ± 984.2 | 18,099 ± 1558 | 0.8605 <sup>b</sup>  |
| Oncostatin M | 1579 ± 303.5   | 1826 ± 297.6  | 0.1514 <sup>a</sup>  |
| TPO          | 889.3 ± 213.9  | 1041 ± 258.4  | 0.0425 <sup>a</sup>  |
| VEGF         | 1068 ± 277.9   | 1022 ± 234    | 0.791 <sup>a</sup>   |
| PDGF-BB      | 2624 ± 567.6   | 2517 ± 416.6  | 0.8501 <sup>a</sup>  |
| Leptin       | 8658 ± 1934    | 9398 ± 1825   | 0.3394 <sup>a</sup>  |
| BDNF         | 5719 ± 1000    | 5736 ± 815.4  | 0.9657 <sup>b</sup>  |
| BLC          | 1068 ± 257.8   | 920.9 ± 173.7 | 0.2661 <sup>b</sup>  |
| CK beta 8-1  | 867.7 ± 210.1  | 732.2 ± 141.7 | 0.2036 <sup>a</sup>  |

| Marker          | Pre            | Post           | p-value             |
|-----------------|----------------|----------------|---------------------|
| Eotaxin         | 2490 ± 495.3   | 2351 ± 304.6   | 0.585 <sup>b</sup>  |
| Eotaxin-2       | 1615 ± 351.7   | 1493 ± 218.8   | 0.5026 <sup>b</sup> |
| Eotaxin-3       | 1122 ± 148.5   | 1033 ± 102.8   | 0.5186 <sup>a</sup> |
| FGF-4           | 1065 ± 271.5   | 1027 ± 216.7   | 0.9697 <sup>a</sup> |
| FGF-6           | 405.9 ± 35.43  | 419.8 ± 43.88  | 0.5518 <sup>b</sup> |
| FGF-7           | 663.8 ± 187    | 593.6 ± 158    | 0.3013 <sup>a</sup> |
| FGF-9           | 1471 ± 363.7   | 1365 ± 276.8   | 0.6221 <sup>a</sup> |
| Flt-3 Ligand    | 1508 ± 413.3   | 1288 ± 297.9   | 0.5825 <sup>a</sup> |
| Fractalkine     | 1231 ± 307.9   | 936.7 ± 193.7  | 0.0737 <sup>a</sup> |
| GCP-2           | 1084 ± 300     | 839.2 ± 175.9  | 0.1294 <sup>a</sup> |
| GDNF            | 1316 ± 248.2   | 1151 ± 131.8   | 0.4697 <sup>a</sup> |
| HGF             | 850.9 ± 184.9  | 754.4 ± 119.8  | 0.6772 <sup>a</sup> |
| IGFBP-1         | 3923 ± 931.2   | 3596 ± 625     | 0.4532 <sup>b</sup> |
| IGFBP-2         | 8487 ± 1119    | 8859 ± 722.3   | 0.5876 <sup>b</sup> |
| IGFBP-3         | 1495 ± 436.8   | 1715 ± 383.7   | 0.2334 <sup>a</sup> |
| IGFBP-4         | 3087 ± 1180    | 3126 ± 1185    | 0.9097 <sup>a</sup> |
| IL-16           | 990.5 ± 233.6  | 929.9 ± 190    | 0.9097 <sup>a</sup> |
| IP-10           | 1773 ± 313.4   | 1428 ± 201.4   | 0.021 <sup>a</sup>  |
| LIF             | 1165 ± 296.3   | 954.9 ± 201.5  | 0.1763 <sup>a</sup> |
| LIGHT           | 1126 ± 251.6   | 898.6 ± 157    | 0.1099 <sup>a</sup> |
| MCP-4           | 793.6 ± 207.5  | 645 ± 121.9    | 0.5044 <sup>a</sup> |
| MIF             | 1282 ± 357.6   | 1124 ± 313     | 0.6221 <sup>a</sup> |
| MIP-3-alpha     | 675.3 ± 126.5  | 609.2 ± 103.8  | 0.3577 <sup>b</sup> |
| NAP-2           | 5909 ± 837.7   | 5354 ± 723.8   | 0.1011 <sup>b</sup> |
| NT-3            | 1418 ± 200.8   | 1383 ± 147.3   | 0.9097 <sup>a</sup> |
| NT-4            | 932.8 ± 238.5  | 952.5 ± 218.2  | 0.7183 <sup>a</sup> |
| Osteopontin     | 11,903 ± 1633  | 12,746 ± 1223  | 0.255 <sup>b</sup>  |
| Osteoprotegerin | 1083 ± 286.4   | 1014 ± 201.2   | 0.7334 <sup>a</sup> |
| PARC            | 3490 ± 961.7   | 3390 ± 863     | 0.6221 <sup>a</sup> |
| PIGF            | 681.2 ± 160    | 573.5 ± 115.9  | 0.1699 <sup>a</sup> |
| TGF- b 2        | 1124 ± 421.6   | 867.2 ± 293.2  | 0.3804 <sup>a</sup> |
| TGF- b 3        | 1084 ± 252.6   | 851.8 ± 125.3  | 0.2661 <sup>a</sup> |
| TIMP-1          | 7015 ± 963.2   | 6121 ± 766.6   | 0.2451 <sup>b</sup> |
| TIMP-2          | 12,102 ± 856.8 | 12,010 ± 702.8 | >0.999 <sup>a</sup> |

**Supplementary File S2.** Data as mean ± standard error of mean (SEM), and p-values of the 80 inflammatory mediators analyzed in plasma human samples. a paired t test, b Wilcoxon test.

| IL-6        |      |      |         | TNF-α       |      |      |         |
|-------------|------|------|---------|-------------|------|------|---------|
| SPPB\Marker | Up   | Down | Total % | SPPB\Marker | Up   | Down | Total % |
| Improved    | 2/12 | 6/12 | 67%     | Improved    | 2/12 | 6/12 | 67%     |
| Worsen      | 2/12 | 2/12 |         | Worsen      | 2/12 | 2/12 |         |
| CXCL-1      |      |      |         | IL-7        |      |      |         |
| SPPB\Marker | Up   | Down | Total % | SPPB\Marker | Up   | Down | Total % |
| Improved    | 1/12 | 7/12 | 58%     | Improved    | 2/12 | 6/12 | 58%     |
| Worsen      | -    | 4/12 |         | Worsen      | 1/12 | 3/12 |         |
| MCP-1       |      |      |         | GM-CSF      |      |      |         |
| SPPB\Marker | Up   | Down | Total % | SPPB\Marker | Up   | Down | Total % |
| Improved    | 4/12 | 4/12 | 50%     | Improved    | 1/12 | 7/12 | 67%     |
| Worsen      | 2/12 | 2/12 |         | Worsen      | 1/12 | 3/12 |         |
| CXCL-10     |      |      |         | IL-4        |      |      |         |
| SPPB\Marker | Up   | Down | Total % | SPPB\Marker | Up   | Down | Total % |
| Improved    | 1/12 | 7/12 | 83%     | Improved    | 6/12 | 2/12 | 58%     |
| Worsen      | 3/12 | 1/12 |         | Worsen      | 3/12 | 1/12 |         |
| IL-1β       |      |      |         | p21         |      |      |         |
| SPPB\Marker | Up   | Down | Total % | SPPB\Marker | Up   | Down | Total % |
| Improved    | -    | 8/12 | 92%     | Improved    | 1/12 | 7/12 | 67%     |
| Worsen      | 3/12 | 1/12 |         | Worsen      | 1/12 | 3/12 |         |
| IL-10       |      |      |         | p16         |      |      |         |
| SPPB\Marker | Up   | Down | Total % | SPPB\Marker | Up   | Down | Total % |
| Improved    | 5/12 | 3/12 | 50%     | Improved    | 2/12 | 6/12 | 67%     |
| Worsen      | 3/12 | 1/12 |         | Worsen      | 2/12 | 2/12 |         |
| RANTES      |      |      |         |             |      |      |         |
| SPPB\Marker | Up   | Down | Total % |             |      |      |         |
| Improved    | 7/12 | 1/12 | 58%     |             |      |      |         |
| Worsen      | 4/12 | -    |         |             |      |      |         |

**Supplementary File S3.** Association analysis comparing functional (improve/worsen) and biomarkers (increase/decrease) changes in Primary Care cohort.

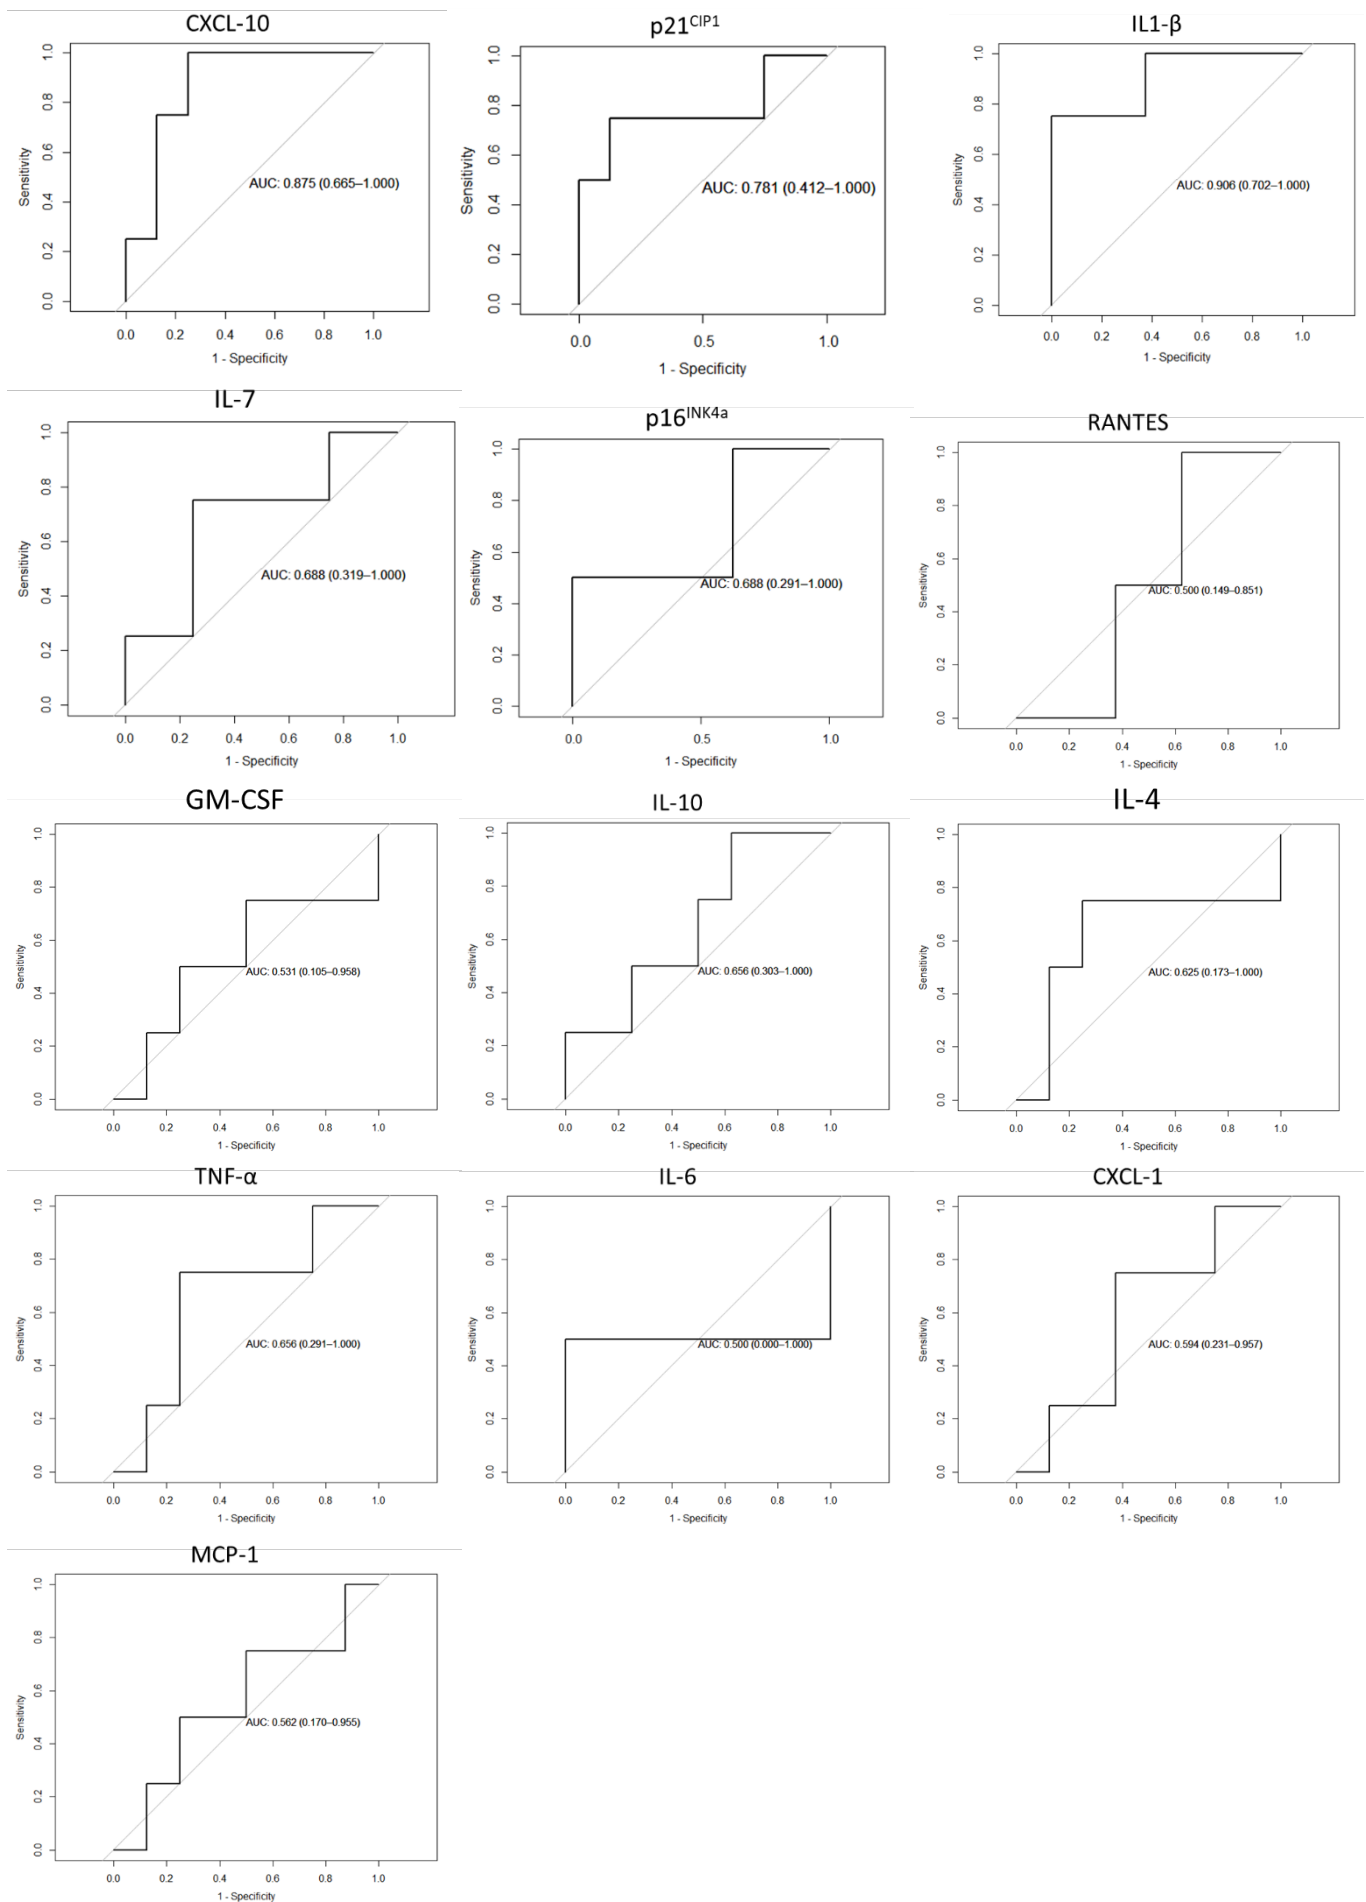

**Supplementary File S4.** ROC curves of inflammatory and senescence markers analyzed in Primary Care setting cohort.

**A**

| Variable           | Rest<br>(Mean ± SD) | Trained<br>(Mean ± SD) | <i>p</i> -value |
|--------------------|---------------------|------------------------|-----------------|
| Body weight        | 36.99 ± 4.66        | 36.30 ± 4.57           | 0.8506          |
| Grip strength      | 4.12 ± 0.94         | 4.31 ± 0.70            | 0.6217          |
| Motor coordination | 2.21 ± 0.77         | 2.07 ± 0.67            | 0.6917          |
| Endurance          | 427.75 ± 111.24     | 427.83 ± 121.85        | 0.9988          |

**B**

| Variable           | Pre<br>(Mean ± SD) | Post<br>(Mean ± SD) | <i>p</i> -value |
|--------------------|--------------------|---------------------|-----------------|
| Body weight        | 36.99 ± 4.66       | 35.89 ± 4.07        | 0.3663          |
| Grip strength      | 4.12 ± 0.94        | 3.49 ± 0.97         | <i>0.0967</i>   |
| Motor coordination | 2.21 ± 0.77        | 1.22 ± 0.30         | <b>0.0027</b>   |
| Endurance          | 427.75 ± 111.24    | 335.38 ± 89.59      | <b>0.0038</b>   |

**Supplementary File S5.** Analysis of clinical data in mice cohort. **(A)** Comparison of functional parameters before the intervention in trained vs rest group. **(B)** Comparison of functional parameters in rest mice before and after the intervention. Bold numbers represent statistical significance ( $p < 0.05$ ), and italic numbers represents a tendency ( $p < 0.1$ ).

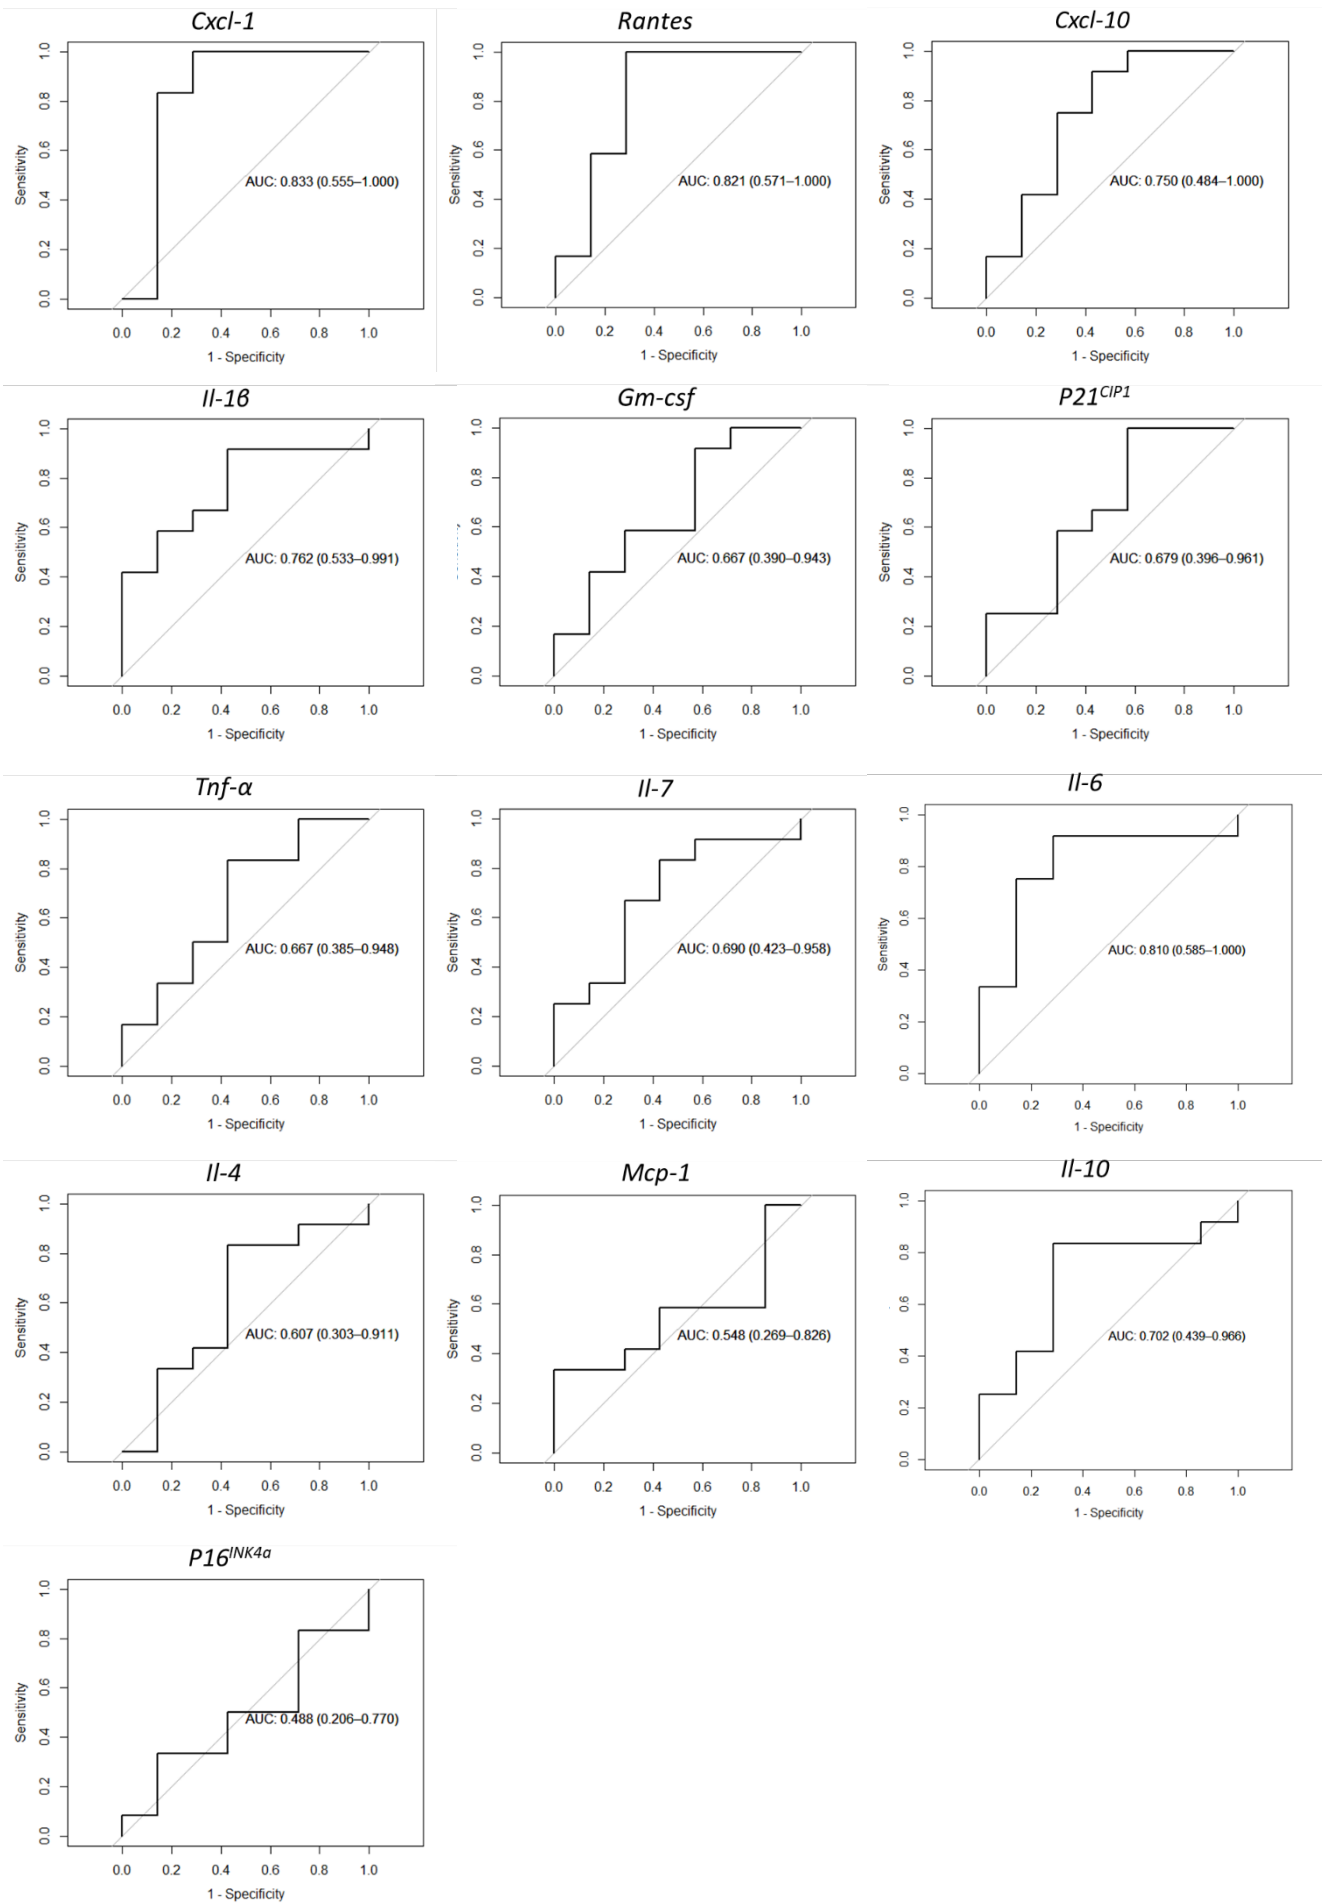

**Supplementary File S6.** ROC curves of inflammatory and senescence markers analyzed in mice cohort.
